# Supplementary material for: Controlled synthesis and assembly into anisotropic arrays of magnetic cobalt-substituted magnetite nanocubes
Source: Royal Society of Chemistry journal article supplement (doi:10.1039/c4nr07331b), 2015-01-01
Supplement: c4nr07331b1.pdf [file c4nr07331b1.pdf]

## Supporting Information

### **Controlled Synthesis and Assembly into Anisotropy Arrays of Magnetic Cobalt-Substituted Magnetite Nanocubes**

Weiwei Yang,<sup>1</sup> Yongsheng Yu,<sup>1\*</sup> Liang Wang,<sup>2</sup> Chunhui Yang,<sup>1</sup> and Haibo Li<sup>3</sup>

<sup>1</sup>School of Chemical Engineering and Technology, Harbin Institute of Technology,

Harbin, Heilongjiang 150001, China

<sup>2</sup>School of Materials Science and Engineering, Harbin Institute of Technology, Harbin

150001, China

<sup>3</sup>Key Laboratory of Functional Materials Physics and Chemistry of the Ministry of Education, Jilin Normal University, Changchun 130103, China

#### **This file includes:**

Materials and Methods

Figure S1 to S4

#### **Materials and Methods**

**Chemicals and Materials.** Oleylamine (OAm, >70%), Benzyl ether (BE, technical grade 99%), oleic acid (OAc, technical grade, 90%), cobalt(II) acetylacetonate (Co(acac)<sub>2</sub>) hydrate and iron(III) acetylacetonate (Fe(acac)<sub>3</sub>) (99%), hexane (98.5%), ethanol (100%) were all purchased from Sigma Aldrich.

#### **50 nm Hard Magnetic Co<sub>0.4</sub>Fe<sub>2.6</sub>O<sub>4</sub> Nanoparticles (NCs) Synthesis**

Fe(acac)<sub>3</sub> (1.33 mmol), Co(acac)<sub>2</sub> (0.665 mmol), OAc (2.5 mL), and BE (20 mL) were mixed and magnetically stirred under a flow of nitrogen at room temperature. Then the solution was heated to 290 °C at a heating rate of 20 °C/min kept at the synthesis temperature for 30 min. The heating source was then removed, and the solution was cooled to room temperature, after which the solution was exposed to air. A black product was precipitated by adding 40ml of ethanol, and separated by centrifugation. Finally, the NPs were dispersed in hexane.

**Characterization.** X-ray diffraction (XRD) characterization was carried out on a Bruker AXS D8-Advanced diffractometer with Cu  $K\alpha$  radiation ( $\lambda = 1.5418 \text{ \AA}$ ). The Inductively coupled plasma-atomic emission spectroscopy (ICP-AES) measurements were carried on a JY2000 Ultrace ICP Atomic Emission Spectrometer equipped with a JY AS 421 autosampler and 2400g/mm holographic grating. Samples for transmission electron microscopy (TEM) analysis were prepared by depositing a single drop of diluted clusters dispersion in hexane on amorphous carbon coated copper grids. TEM images were obtained with a Philips CM 20 operating at 200 kV. High-resolution TEM (HRTEM) and the atomically resolved scanning transmission electron microscopy- electron energy-loss spectroscopy (STEM-EELS) images were obtained on a Fei Tecnai Osiris with an accelerating voltage of 200 kV. Magnetic studies were carried out using a Lakeshore 7404 high sensitivity vibrating sample magnetometer (VSM) with fields up to 12.5 kOe at room temperature.

## Figures

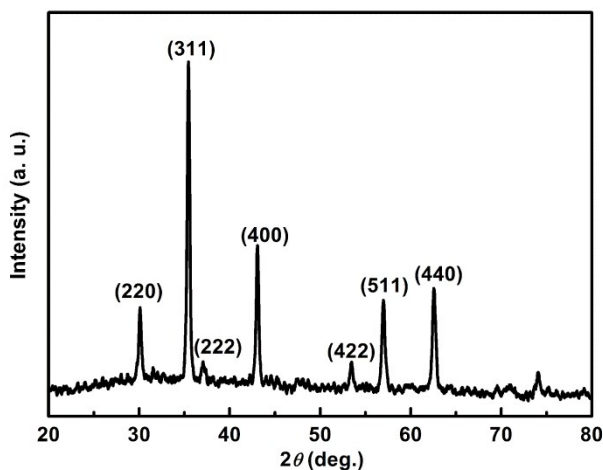

**Figure S1.** XRD pattern of the 50 nm  $\text{Co}_{0.4}\text{Fe}_{2.6}\text{O}_4$  NCs synthesized at 290 °C for 30 min with a heating rate of 20 °C/min

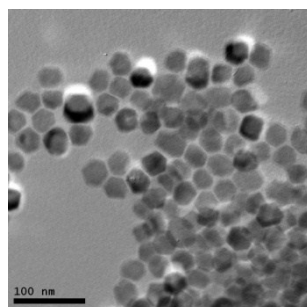

**Figure S2.** TEM image of the 35 nm  $\text{Co}_{0.4}\text{Fe}_{2.6}\text{O}_4$  NPs with polyhedral shape.

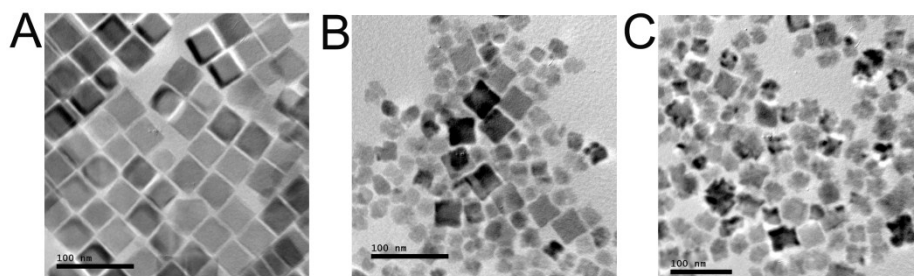

**Figure S3.** TEM images of the as-synthesized  $\text{Co}_x\text{Fe}_{3-x}\text{O}_4$  NPs with OAm (A) 0.5 mL, (B) 1.0 mL, and (C) 2.0 mL.

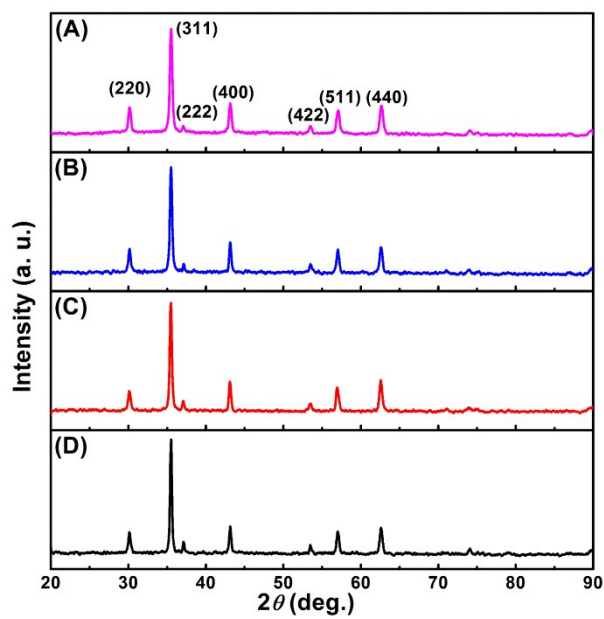

**Figure S4.** XRD patterns of the as-synthesized  $\text{Co}_x\text{Fe}_{3-x}\text{O}_4$  NCs with OA (A) 3.1 mL, (B) 1.27 mL, (C) 0.9 mL, and (D) 10 mL BE and 1.27 mL OA.
